# Supplementary material
Source: publisher figshare collection journal article supplement (https://acs.figshare.com/ndownloader/files/11456759)
Supplement: Supplementary file 1 [file 11456759]

## Supporting Information

# High-Efficiency All Polymer Solar Cell with a Low Voltage Loss of 0.56 V

*Xiaofeng Chen<sup>†‡</sup>, Mingzhi Zhao<sup>†</sup>, Zhi-guo Zhang<sup>†</sup>, Yongfang Li<sup>§</sup>, Xiaoyu Li<sup>\*‡</sup>, Haiqiao Wang<sup>\*</sup>*

*,<sup>†‡</sup>*

<sup>†</sup>State Key Laboratory of Organic-Inorganic Composite, Beijing University of Chemical Technology, Beijing 100029, China.

E-mail: wanghaiqiao@mail.buct.edu.cn (H. Wang)

<sup>‡</sup>Key Laboratory of Carbon Fiber and Functional Polymers, Ministry of Education, Beijing University of Chemical Technology, Beijing 100029, China

E-mail: lixy@mail.buct.edu.cn (X. Li)

<sup>§</sup>Beijing National Laboratory for Molecular Sciences, Institute of Chemistry, Chinese Academy of Sciences, Beijing 100190, China

### **Polymer solar cells fabrication and characteristic**

PSCs device with a conversion configuration of ITO/PEDOT:PSS/Active Layer/PDINO/Al. Patterned ITO glass was cleaned by scrubbing in detergent and sequentially ultrasonicing in detergent, deionized water, acetone, isopropanol for 20 min and using nitrogen gun dry the glass

then ultraviolet/ozone treat for 15 min before spin-coating about 30 nm PEDOT:PSS and subsequently dried at 150°C for 15 min in air and transfer to glove box filled with ultrahigh nitrogen gas. Chloroform solution of PBDT-DFQX1:O-IDTBR (totally 19 mg/ml, 1:1.5 wt:wt) and PBDT-DFQX:N2200 (totally 12 mg/ml, 2:1 wt:wt, with 0.5% DIO by volume ) were spin-coating on the prepared ITO glass to form a thickness of ca 100 nm active layer and thermal annealing at 110 °C for 3 min and 10 min for SMA and APSC respectively. And at the top of active layer spin-coating ca 10 nm PDINO as cathode modify layer, transfer to vacuum chamber to vacuum evaporation deposit ca 100 nm Al as cathode at pressure of  $1 \times 10^{-5}$  Pa.

The devices current-voltage (J-V) measurement were conducted on a computer controlled Keithley 2450 Source-Measure Unit with light intensity of 100 mW/cm<sup>2</sup> xenon lamp simulated light filtrated with AM 1.5 filter as light source calibrated with a standard single-crystal Si photovoltaic cell.

### **Carrier mobility device fabrication and measurement**

Hole mobility device with configuration of ITO/PEDOT:PSS/Active Layer/Au, and electronic mobility device with configuration of ITO/ZnO/Active Layer/PDINO/Al. Through Mott-Gurney equation to estimate carrier mobility, the equation describe as  $J = \frac{9}{8} \epsilon \epsilon_0 \mu \frac{(V - V_{bi})^2}{L^3}$  where  $\epsilon$  is the dielectric constant of the polymer,  $\epsilon_0$  is the permittivity of the vacuum,  $\mu$  is the mobility of hole or electron and L is the thickness of active layer, V is the voltage applied to the device and  $V_{bi}$  is the built-in voltage.

**Figure S1** show the synthetic route to the polymer. Monomer M1 (BDT-C8) and M2 (DFQX) were reported by our group<sup>1, 2</sup> and by still coupling polymerization between M1 and M2 to get

copolymer PBDT-DFQX1. The crude copolymer was purified by continuous extraction with methanol, hexanes and chloroform and vacuum evaporation to remove most chloroform and then deposition by pouring into methanol.

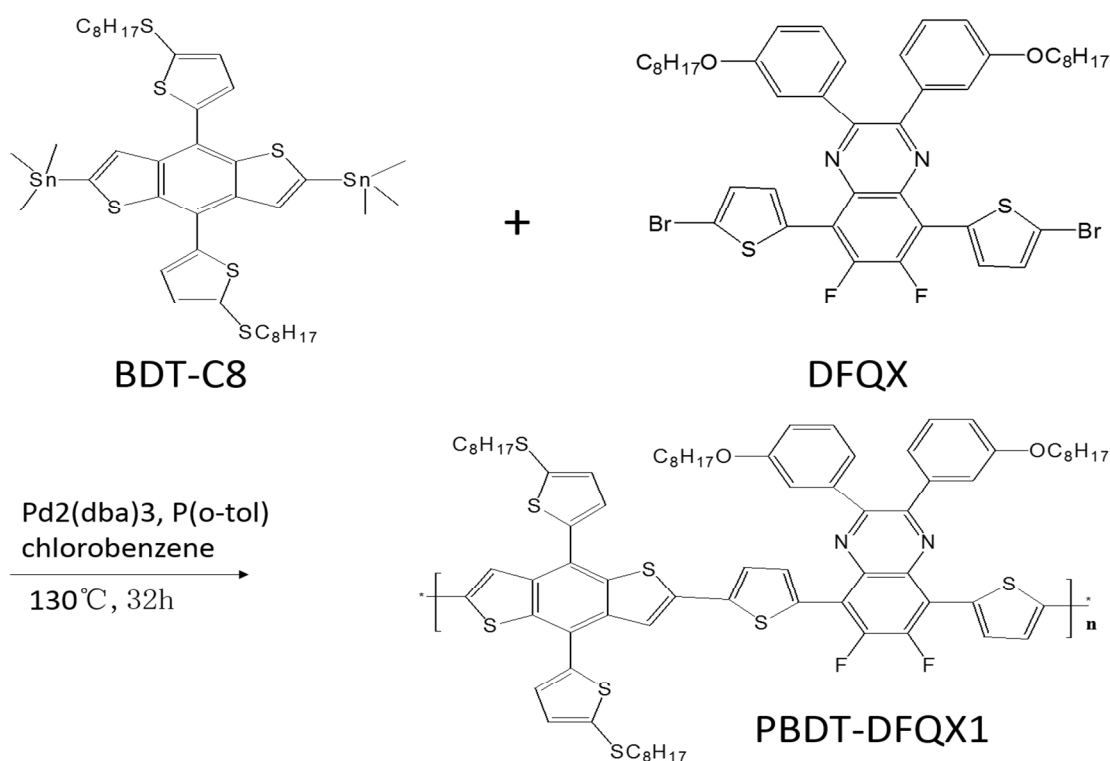

**Figure S1.** Synthesis route to polymer donor PBDT-DFQX1

### CV Characteristic

The copolymer energy levels were measured by electrochemical cyclic voltammetry with  $\text{Fc}/\text{Fc}^+$  couple as internal reference and  $\text{Ag}/\text{AgCl}$  as reference electrode. The highest occupied molecular orbital (HOMO) energy levels ( $E_{\text{HOMO}}$ ) was determined by using the equation:  $E_{\text{HOMO}} = -e(E_{\text{ox}} + 4.36)$  eV, where the  $E_{\text{ox}}$  is the onset oxidation potential was obtained from cyclic voltammogram of PBDT-DFQX1. And the lowest unoccupied molecular orbital (LUMO)

energy levels ( $E_{\text{LUMO}}$ ) was calculated by using the equation of  $E_{\text{LUMO}} = E_{\text{HOMO}} + E_{\text{opt}}$ . The calculated  $E_{\text{HOMO}}/E_{\text{LUMO}}$  values were to be -5.46/-3.69eV.

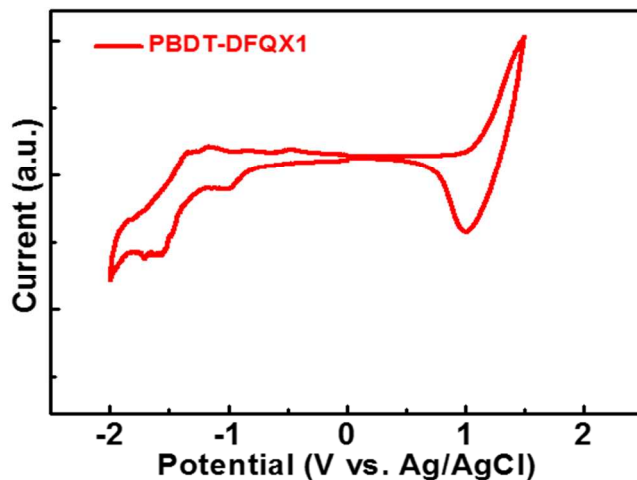

**Figure S2.** Cyclic voltammogram of PBDT-DFQX1

## References

- (1) Zhao, M.; Qiao, Z.; Chen, X.; Jiang, C.; Li, X.; Li, Y.; Wang, H., High Photovoltaic Performance of As-Cast Devices Based on New Quinoxaline-Based Donor-Acceptor Copolymers. *Polym.Chem.* **2017**, 8 (37), 5688-5697.
- (2) Qiao, Z.; Wang, M.; Zhao, M.; Zhang, Z.; Li, Y.; Li, X.; Wang, H., Effect of Fluorine Substitution on the Photovoltaic Performance of Poly(Thiophene-Quinoxaline) Copolymers. *Polym.Chem.* **2015**, 6 (47), 8203-8213.
